# Supplementary material
Source: Royal Society of Chemistry journal article supplement (doi:10.1039/d6nr00367b)
Supplement: d6nr00367b1.pdf [file d6nr00367b1.pdf]

## Supplementary Information

### **Rationally Designed Freestanding Peapod-like Carbon-coated V<sub>2</sub>O<sub>3</sub> Nanowires Film Cathodes Enable Highly Stable Aqueous Zinc-ion batteries**

Xingxing Li,<sup>a\*</sup> Linling Zheng,<sup>a</sup> Zhirui Huang,<sup>a</sup> Meichen Ding,<sup>a</sup> Haishu Wu,<sup>a</sup> Hao Xie,<sup>a</sup>  
Mengying Xu,<sup>a</sup> Guoqiang Ma,<sup>b</sup> and Biao Gao<sup>c\*</sup>

<sup>a</sup>School of Materials Science and Energy Engineering, Hubei University of Education,  
Wuhan 430205, China

E-mail: lixingxing@hue.edu.cn

<sup>b</sup>School of Applied Physics and Materials, Wuyi University, Jiangmen 529020, China

<sup>c</sup>The State Key Laboratory of Refractories and Metallurgy and Institute of Advanced  
Materials and Nanotechnology, Wuhan University of Science and Technology,  
Wuhan 430081, China

#### **Corresponding authors:**

E-mail: lixingxing@hue.edu.cn

E-mail: gaobiao@wust.edu.cn

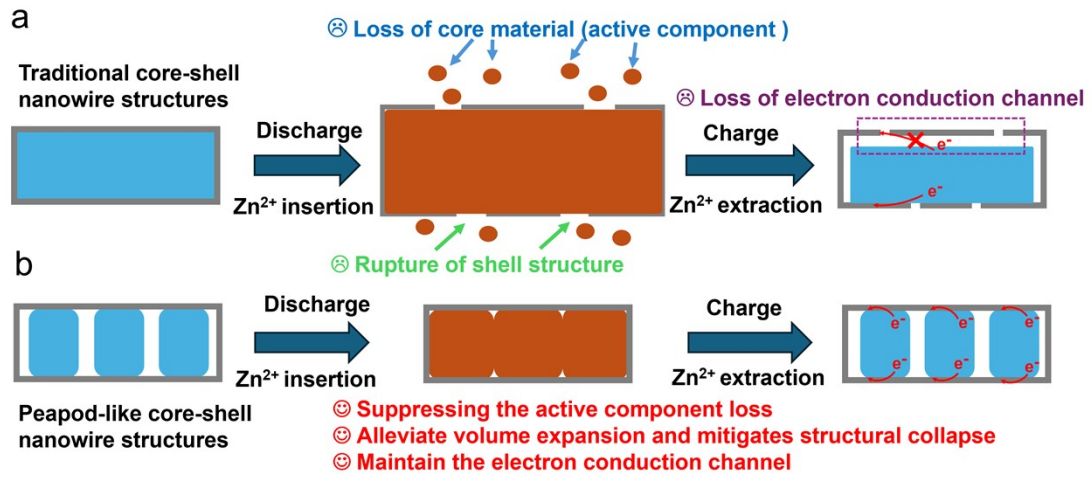

**Fig. S1.** Schematic illustration of the dynamics and stability in traditional core-shell nanowire structures and peapod-like core-shell nanowire structures.

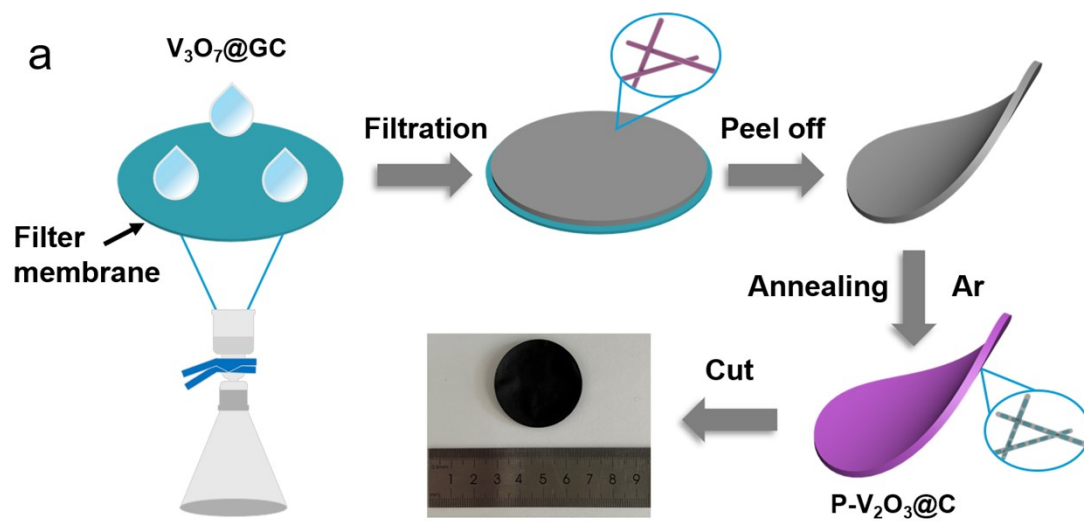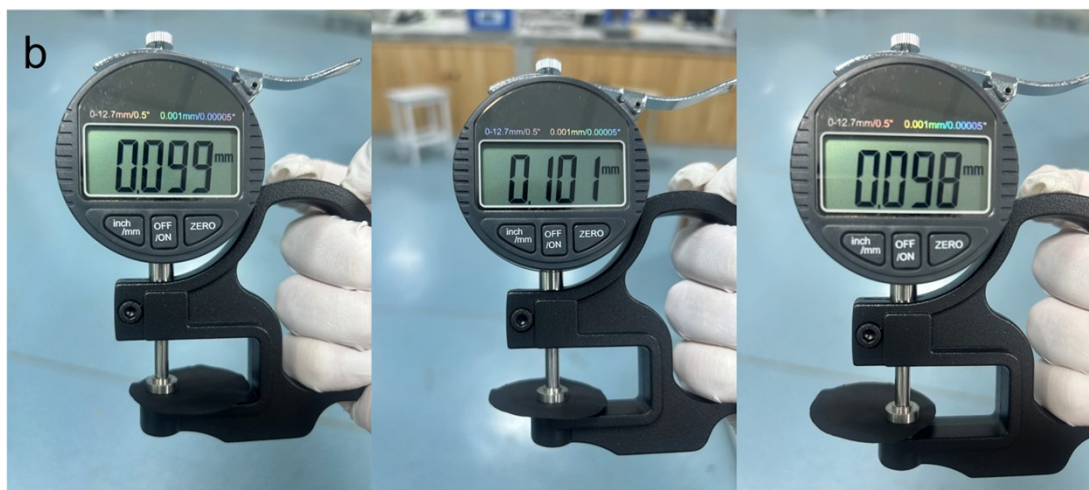

**Fig. S2.** (a) Schematic illustration of the fabrication of flexible and freestanding  $P-V_2O_3@C$  film electrode. (b) The thickness of the electrode was measured at different positions using a thickness gauge.

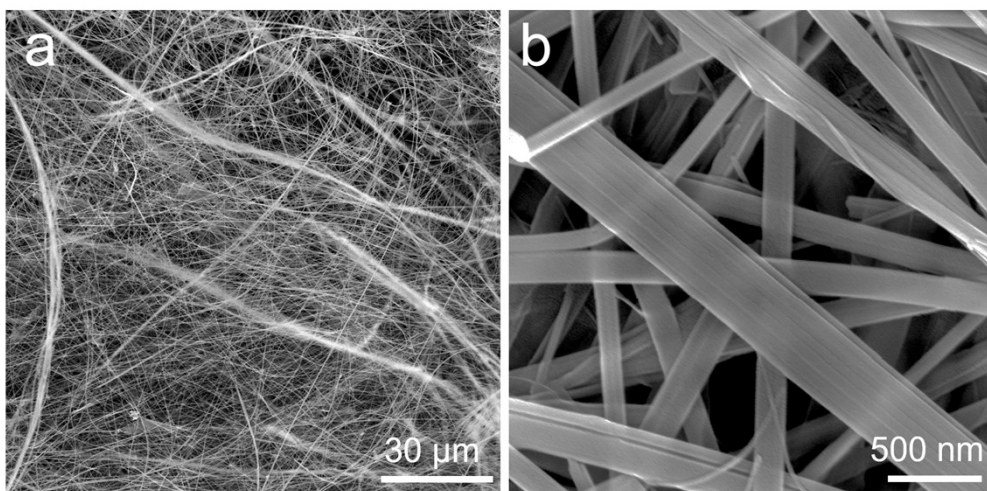

**Fig. S3.** SEM images of  $V_3O_7 \cdot xH_2O$  nanowires.

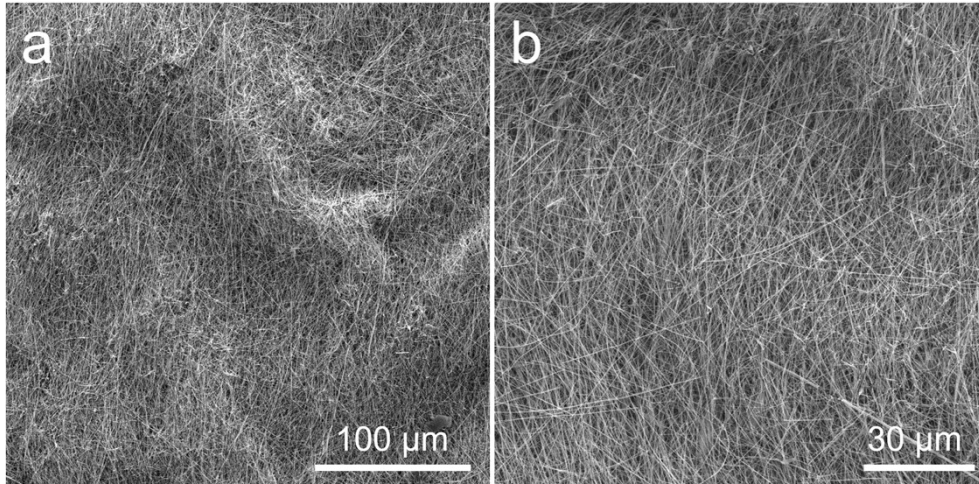

**Fig. S4.** SEM images of P-V<sub>2</sub>O<sub>3</sub>@C at low magnification.

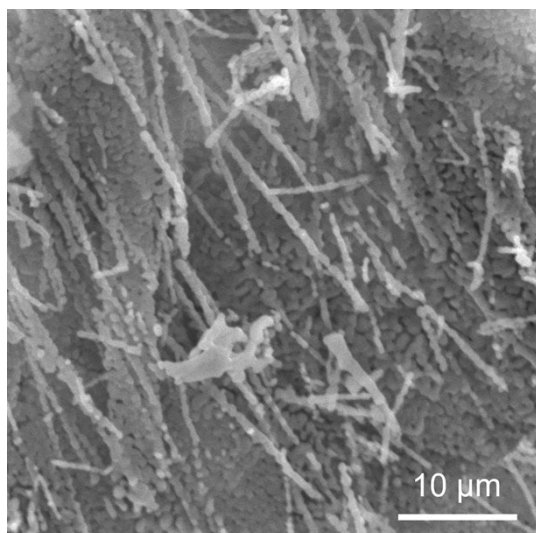

**Fig. S5.** SEM images of V<sub>2</sub>O<sub>5</sub>.

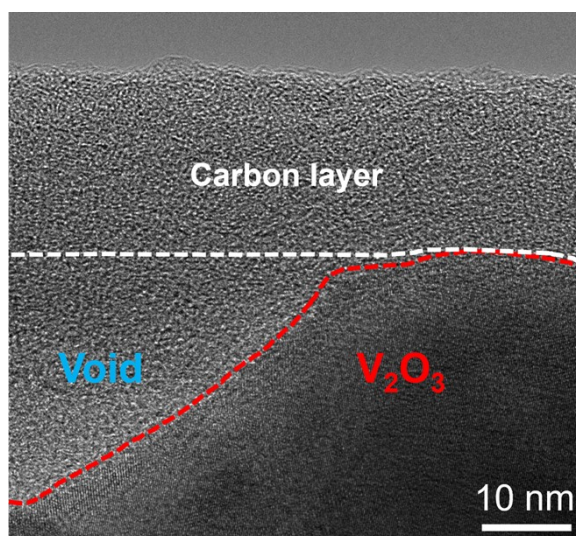

**Fig. S6.** TEM images of P-V<sub>2</sub>O<sub>3</sub>@C at high magnification.

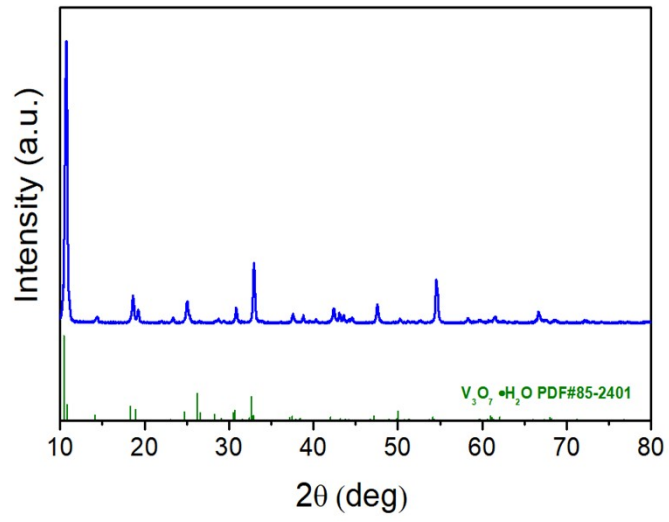

**Fig. S7.** XRD patterns of  $V_3O_7 \cdot xH_2O$  nanowires.

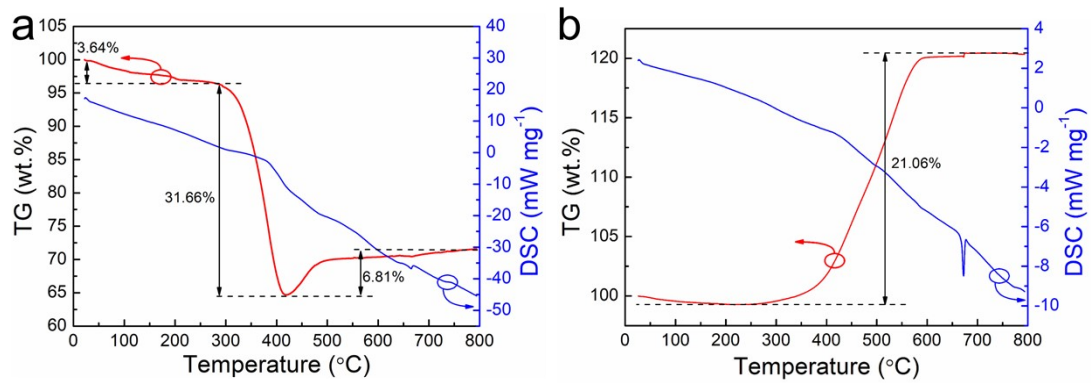

**Fig. S8.** TG-DSC curves of (a) P- $V_2O_3@C$  and (b)  $V_2O_3$ .

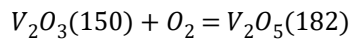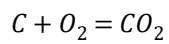

$$V_2O_3 = 71.51\% \times \frac{150}{182} = 58.94\%$$

$$V_2O_3 + C = 96.36\%$$

$$C = (96.36\% - 58.94\%) / 96.36\% = 38.83\%$$

$$V_2O_3 = 58.94\% / 96.36\% = 61.17\%$$

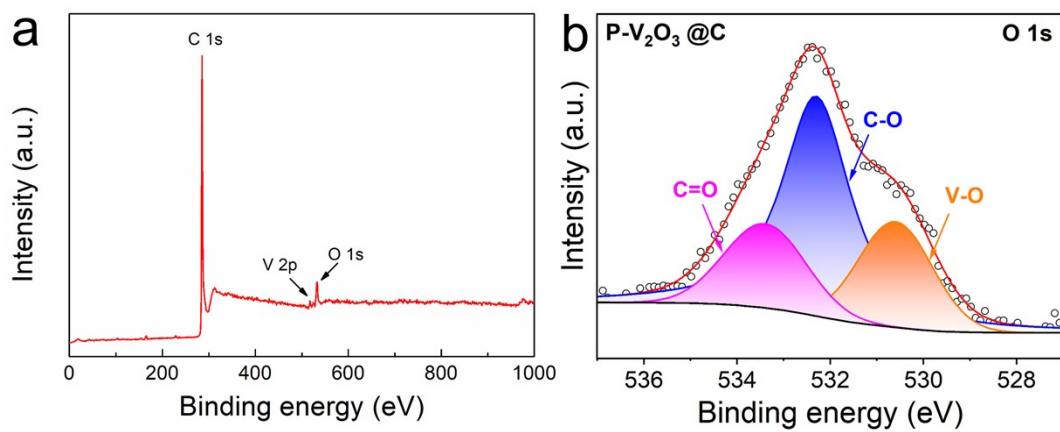

**Fig. S9.** (a) XPS survey spectra of P-V<sub>2</sub>O<sub>3</sub>@C and V 2p. (b) XPS fine spectra of O 1s.

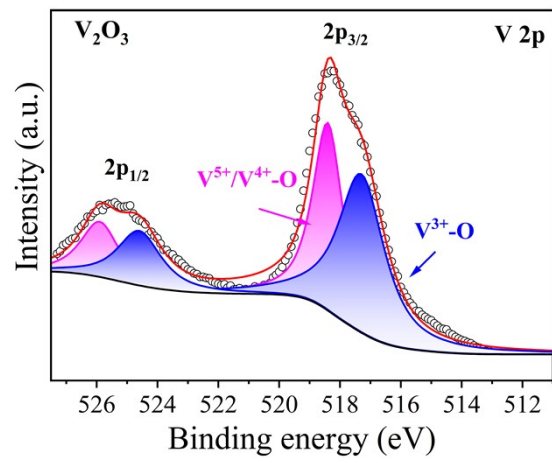

**Fig. S10.** XPS fine spectra of V 2p in pure V<sub>2</sub>O<sub>3</sub>.

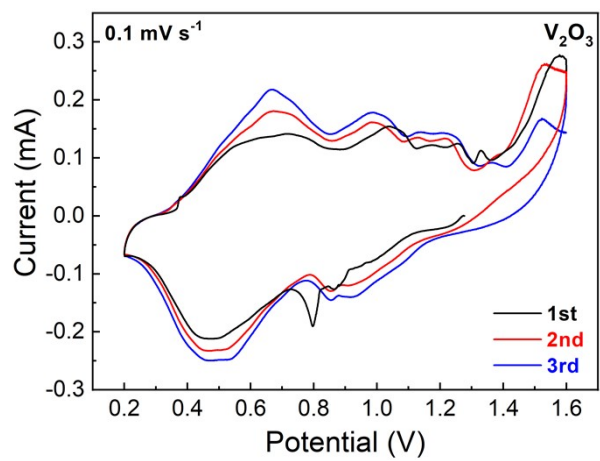

**Fig. S11.** CV curves of pure V<sub>2</sub>O<sub>3</sub> at scan rates ranging from 0.1 mV s<sup>-1</sup>.

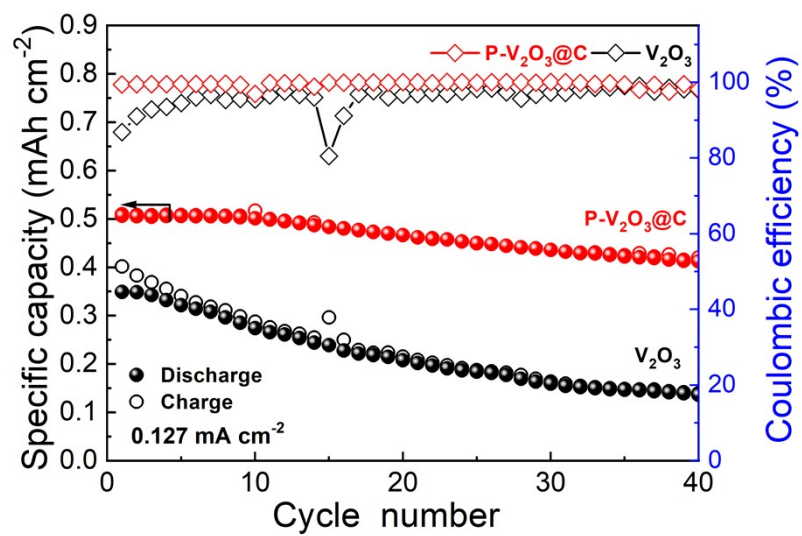

**Fig. S12** Cycle performance of P-V<sub>2</sub>O<sub>3</sub>@C and V<sub>2</sub>O<sub>3</sub> electrode at 0.127 mA cm<sup>-2</sup>

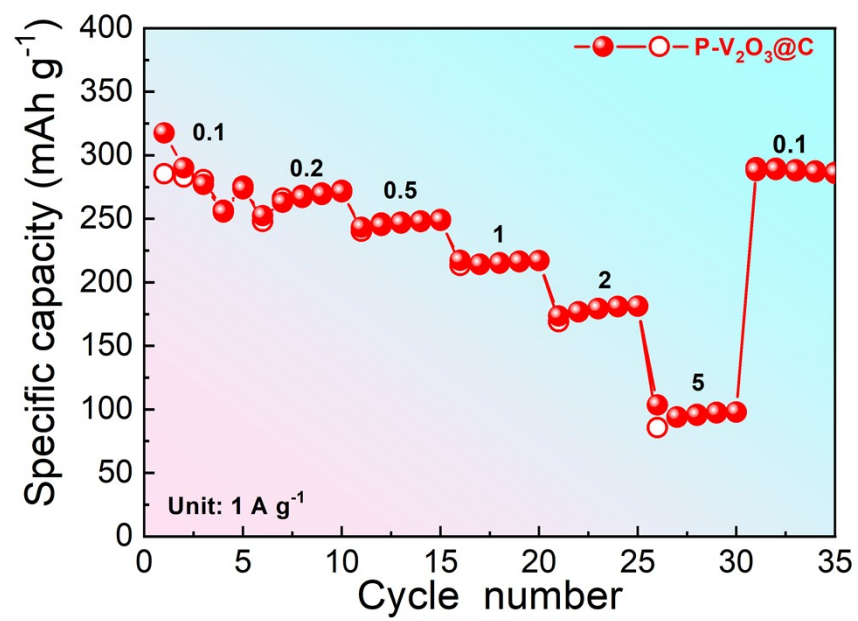

**Fig. S13** Rate performance of P-V<sub>2</sub>O<sub>3</sub>@C thicker electrode (the mass loading is 3.5 mg cm<sup>-2</sup>).

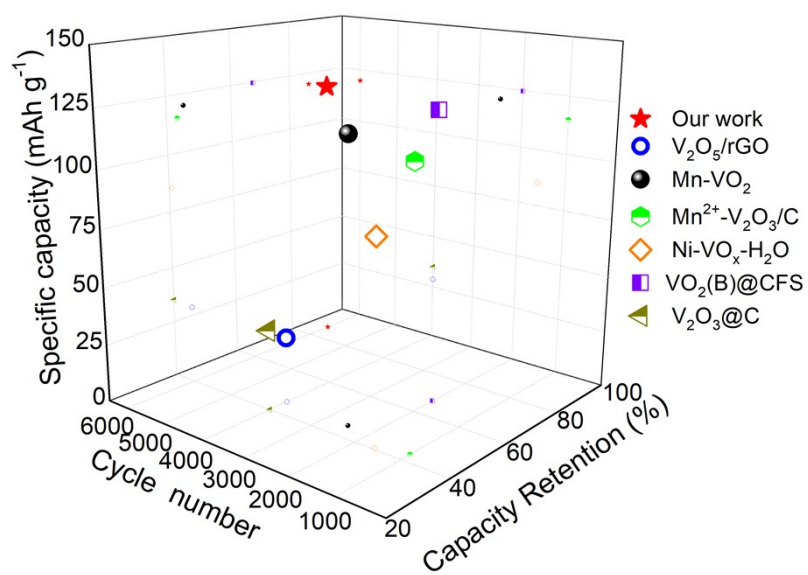

**Fig. S14.** The comparison of cycling behavior of P- $\text{V}_2\text{O}_3@\text{C}$  cathode with reported  $\text{V}_x\text{O}_y$ -based cathodes at  $5 \text{ A g}^{-1}$  for AZIBs.

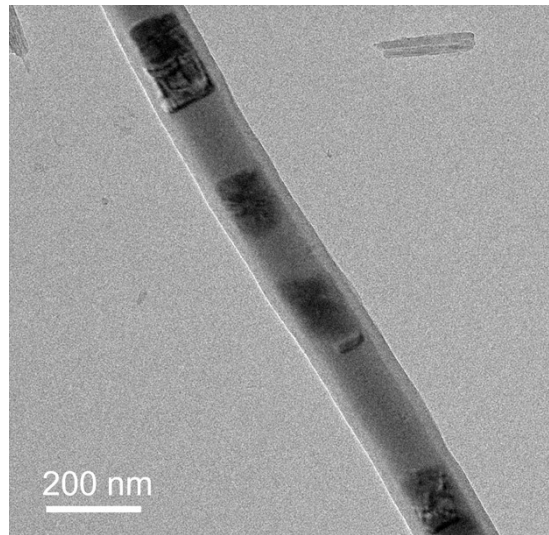

**Fig. S15.** TEM image of P-V<sub>2</sub>O<sub>3</sub>@C after long-term cycling

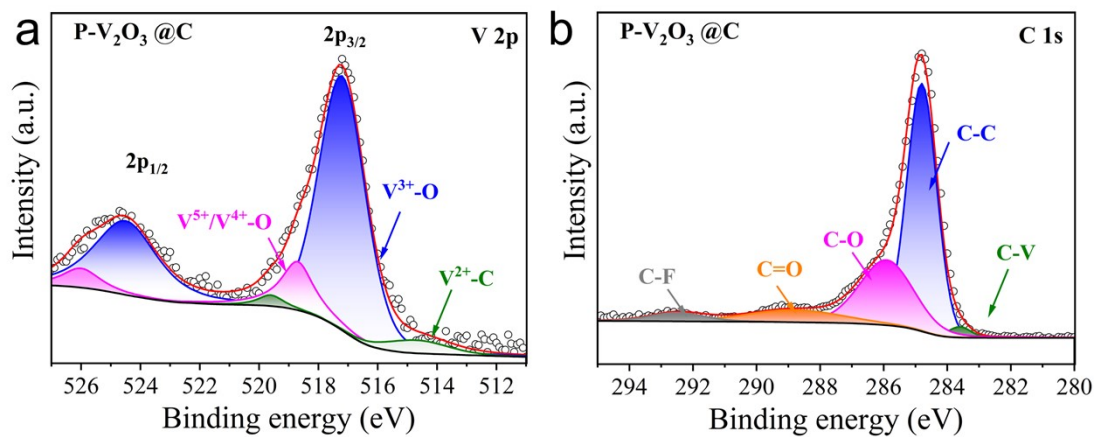

**Fig. S16.** XPS fine spectra of (a) V 2p and (b) C 1s in P-V<sub>2</sub>O<sub>3</sub>@C after long-term cycling.

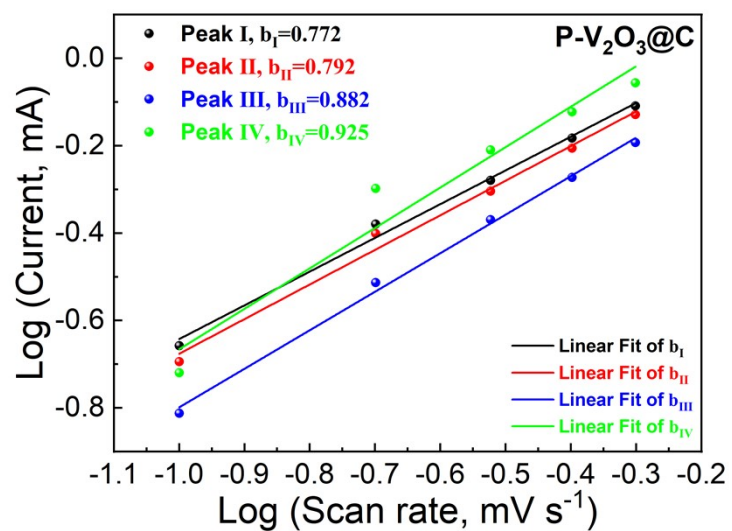

**Fig. S17.** Plots of the relationship between peak current and scan rates ( $\log(i)$  vs  $\log(v)$ ) at each redox peak based on the CV curves.

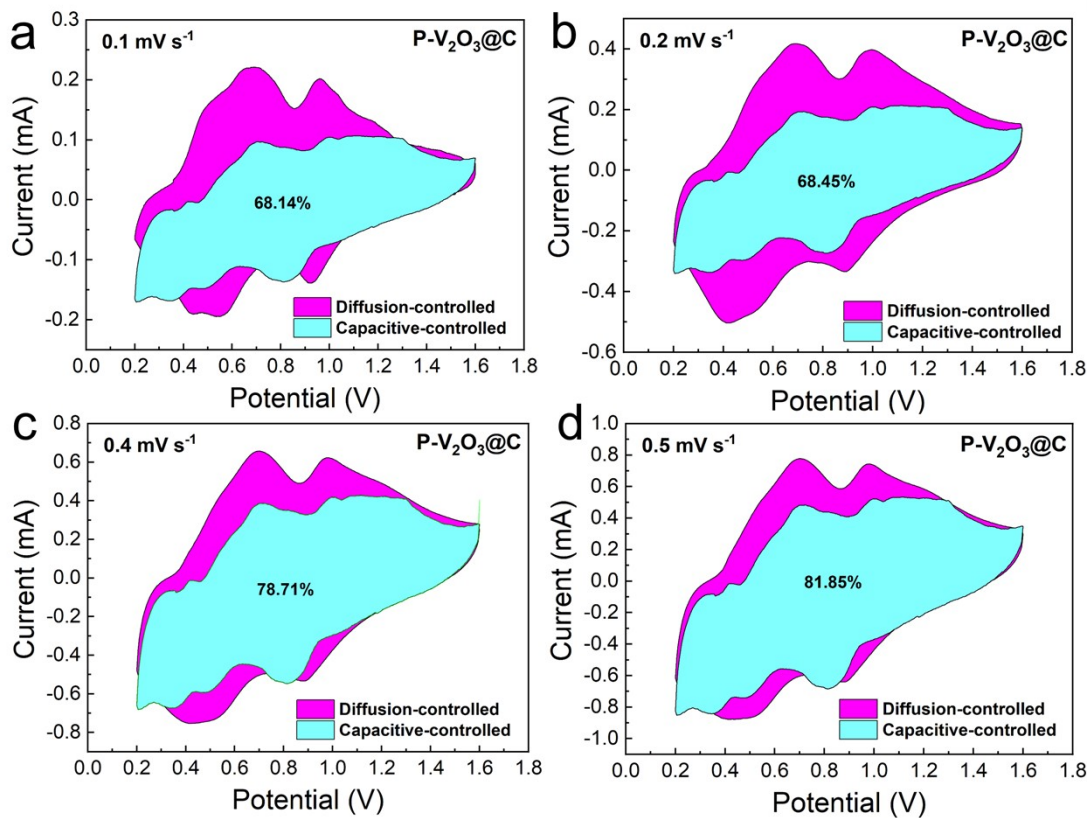

**Fig. S18.** CV curve and a capacitive contribution of P-V<sub>2</sub>O<sub>3</sub>@C at 0.1, 0.2, 0.4 and 0.5 mV s<sup>-1</sup>.

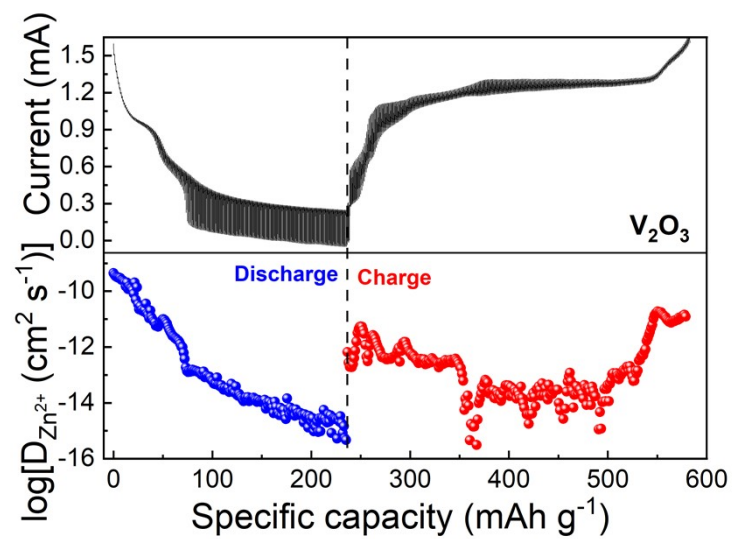

**Fig. S19.** Charge-discharge GITT curves of V<sub>2</sub>O<sub>3</sub> at a current density of 20 mA g<sup>-1</sup> and the corresponding Zn<sup>2+</sup> diffusion coefficient (D<sub>Zn<sup>2+</sup></sub>).

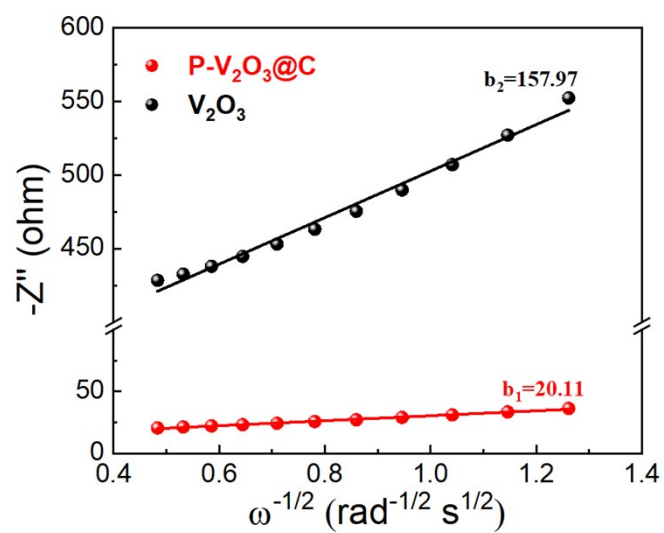

**Fig. S20.** Relationship between  $\omega^{-1/2}$  and  $Z''$  in the low-frequency region.

The linear fit slope of P-V<sub>2</sub>O<sub>3</sub>@C (20.11  $\Omega$  s $^{-1/2}$ ) was lower than the values of pure V<sub>2</sub>O<sub>3</sub> (157.97  $\Omega$  s $^{-1/2}$ ).

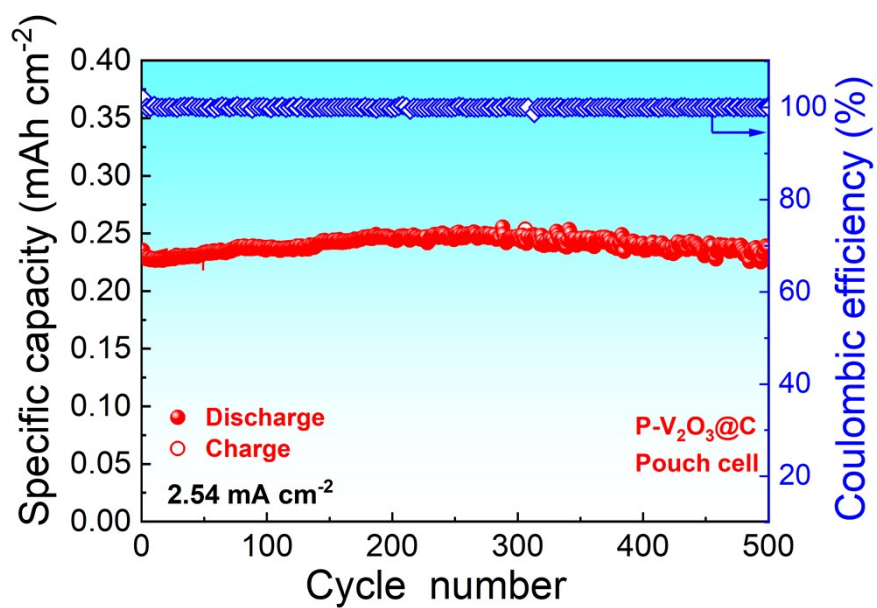

**Fig. S21** Cycle performance of P-V<sub>2</sub>O<sub>3</sub>@C electrode for pouch cell at 2.54 mA cm<sup>-2</sup>.

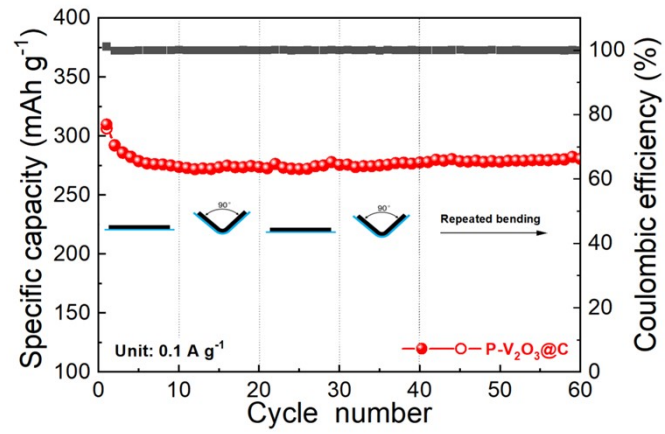

**Fig. S22** Cycling performance under different bending states ( $0.1 \text{ A g}^{-1}$ ) of the P-V<sub>2</sub>O<sub>3</sub>@C-based flexible ZIBs.

**Table S1.** Fitted data from the electrochemical impedance spectra (EIS) of different samples.

| <b>Samples</b>                     | <b><math>R_{\theta}</math> (<math>\Omega</math>)</b> | <b><math>R_{ct}</math> (<math>\Omega</math>)</b> |
|------------------------------------|------------------------------------------------------|--------------------------------------------------|
| P-V <sub>2</sub> O <sub>3</sub> @C | 1.0                                                  | 13.2                                             |
| V <sub>2</sub> O <sub>3</sub>      | 1.9                                                  | 213.7                                            |

**Table S2.** The comparison of cycling behavior of P-V<sub>2</sub>O<sub>3</sub>@C cathode with reported V<sub>x</sub>O<sub>y</sub>-based cathodes at 5 A g<sup>-1</sup> for AZIBs.

| <b>Samples</b>                                     | <b>Specific capacity (mAh g<sup>-1</sup>)</b> | <b>Cycle number</b> | <b>Capacity Retention (%)</b> | <b>Ref.</b>     |
|----------------------------------------------------|-----------------------------------------------|---------------------|-------------------------------|-----------------|
| <b>P-V<sub>2</sub>O<sub>3</sub>@C</b>              | <b>120</b>                                    | <b>6000</b>         | <b>87</b>                     | <b>our work</b> |
| V <sub>2</sub> O <sub>5</sub> /rGO                 | 29                                            | 4000                | 46                            | 1               |
| Mn-VO <sub>2</sub>                                 | 120                                           | 2500                | 45                            | 2               |
| Mn <sup>2+</sup> -V <sub>2</sub> O <sub>3</sub> /C | 115                                           | 1000                | 43                            | 3               |
| Ni-VO <sub>x</sub> -H <sub>2</sub> O               | 85                                            | 1600                | 41                            | 4               |
| VO <sub>2</sub> (B)@CFS                            | 125                                           | 2000                | 67                            | 5               |
| V <sub>2</sub> O <sub>3</sub> @C                   | 35                                            | 4000                | 40                            | 6               |

**Table S3** The proportions of  $V^{5+}/V^{4+}$ -O,  $V^{3+}$ -O and  $V^{2+}$ -C in P- $V_2O_3$ @C before and after cycling.

| Samples                         | $V^{5+}/V^{4+}$ -O (%) | $V^{3+}$ -O (%) | $V^{2+}$ -C (%) |
|---------------------------------|------------------------|-----------------|-----------------|
| P- $V_2O_3$ @C                  | 13.2                   | 75.7            | 11.1            |
| P- $V_2O_3$ @C<br>after cycling | 14.6                   | 78.5            | 6.9             |

## References

1. X. Zheng, J. Tang, B. Ding, X. Hong, Q. Hu, Z. Liu, L. Zou, X. Zhou, P. Wang, C. Li and W. Nie, *Colloids Surf. Physicochem. Eng. Aspects*, 2024, **682**, 132864.
2. D. Wang, W. Liang, X. He, Y. Yang, S. Wang, J. Li, J. Wang and H. Jin, *ACS Appl. Mater. Interfaces*, 2023, **15**, 20876-20884.
3. C. L. Liu, Y. Liu, X. Liu and Y. Gong, *Sustain. Energ. Fuels*, 2022, **6**, 2020-2037.
4. J. Guo, J. Liu, W. Ma, Z. Sang, L. Yin, X. Zhang, H. Chen, J. Liang and D. a. Yang, *Adv. Funct. Mater.*, 2023, **33**, 2302659.
5. X. Li, L. Yang, H. Mi, H. Li, M. Zhang, A. Abliz, F. Zhao, S. Wang and H. Li, *CrystEngComm*, 2021, **23**, 8650-8659.
6. Y. Ding, Y. Peng, S. Chen, X. Zhang, Z. Li, L. Zhu, L.-E. Mo and L. Hu, *ACS Appl. Mater. Interfaces*, 2019, **11**, 44109-44117.
